# Supplementary material
Source: publisher figshare collection journal article supplement (https://tandf.figshare.com/ndownloader/files/24423187)
Supplement: Supplementary file 1 [file 24423187]

*Systematics and Biodiversity*

**SUPPORTING INFORMATION**

**Historical biogeography of smoothhound sharks (genus *Mustelus*) of southern Africa reveals multiple dispersal events from the Northern Hemisphere**

Simo N. Maduna, Edward D. Farrell, Jessica J. Boomer, Ana Veríssimo, Ilaria A.M. Marino, Carlotta Mazzoldi, Lorenzo Zane, Kevin L. Hull, Sabine P. Wintner, Mikhail V. Chesalin, Charlene Da Silva, Chrysoula Gubili, Stefano Mariani and Aletta E. Bester-van der Merwe

**APPENDIX S1 – Sampling and source of DNA**

**Supplementary Table S1** Summary of study taxa and the number of individuals (*N*) per taxon per location and personnel who collected the samples used in the present study

| **Species** | **Code** | ***N*** | **Locality** | **Collector** |
| --- | --- | --- | --- | --- |
| *Mustelus antarcticus* | Man | 8 | Western Australia | Jessica J. Boomer (JJB) |
| *Mustelus asterias* | Mas | 8 | United Kingdom, Wales | Edward D. Farrell (EDF) |
| *Mustelus lenticulatus* | Mle | 8 | New Zealand | JJB |
| *Mustelus mosis* | Mmo | 4 | Sultanate of Oman | Mikhail V. Chesalin (MVC) |
| *Mustelus mustelus* | Mmu | 2 | Mediterranean, Adriatic Sea | Ilaria A. M.Marino (IAMM) |
|  |  | 2 | Mediterranean, Tyrrhenian Sea | IAMM |
|  |  | 4 | Mediterranean, Balearic Sea | EDF |
|  |  | 1 | Guinea-Bissau | Ana Verríssimo (AV), Chrysa Gubili (CG) |
|  |  | 1 | Guinea-Conakry | AV, CG |
|  |  | 2 | Cape Verde | AV, CG |
|  |  | 5 | Angola | Michelle Soekoe (MS) |
|  |  | 1 | Namibia | AV, CG |
|  |  | 1 | South Africa, Langebaan Lagoon | Charlene da Silva |
|  |  | 2 | South Africa, False Bay | MS |
|  |  | 1 | South Africa, Mossel Bay | Gibbs Kuguru (GK) |
|  |  | 1 | South Africa, Durban | KZN Sharks Board |
| *Mustelus palumbes* | Mpa | 4 | South Africa, West Coast | Grant van der Heever |
|  |  | 2 | South Africa, Mossel Bay (East Coast) | GK |
|  |  | 2 | South Africa, Struis Bay (East Coast) | Viking Fisheries |
| *Mustelus punctulatus* | Mpu | 4 | Algeria, Mediterranean Sea | EDF |
|  |  | 4 | Croatia, Adriatic Sea | EDF |
| *Scylliogaleus quecketti* | Squ | 8 | South Africa, Durban | Bruce Mann |
| *Triakis megalopterus* | Tme | 2 | Angola | MS |
|  |  | 2 | Namibia | MS |
|  |  | 2 | South Africa, West Coast | MS |
|  |  | 2 | South Africa, East Coast | MS |
| *Iago omanensis* | Iom | 4 | Sultanate of Oman | MVC |

**APPENDIX S2 – Taxa, Biogeography and Phylogenetic loci**

**Supplementary Table S2** List of triakid taxa used in this study, with localities, biogeographical region assignment used in BioGeoBEARS analysis and GenBank accession numbers. NEA = north-eastern Atlantic Ocean including the Mediterranean Sea; NWI = north-western Indian Ocean; SEA = south-eastern Atlantic Ocean; SEI = south-eastern Indian Ocean; SWI = south-western Indian Ocean; SWP = south-western Pacific Ocean; NA = not available.

| **Genus** | **Species** | **Code** | **Individual** | **Locality** | **Country** | **Biogeographic region** | **KBTBD2** | **CR** | **NADH-2** | **12S-16S** |
| --- | --- | --- | --- | --- | --- | --- | --- | --- | --- | --- |
| *Mustelus* | *antarcticus* | Man | 01 |  | Australia | SEI |  |  |  |  |
| *Mustelus* | *antarcticus* | Man | 02 |  | Australia | SEI |  |  |  |  |
| *Mustelus* | *antarcticus* | Man | 03 |  | Australia | SEI |  |  |  |  |
| *Mustelus* | *antarcticus* | Man | 04 |  | Australia | SEI |  |  |  |  |
| *Mustelus* | *antarcticus* | Man | 05 |  | Australia | SEI |  |  |  |  |
| *Mustelus* | *antarcticus* | Man | 06 |  | Australia | SEI |  |  |  |  |
| *Mustelus* | *antarcticus* | Man | 07 |  | Australia | SEI |  |  |  |  |
| *Mustelus* | *antarcticus* | Man | 08 |  | Australia | SEI |  |  |  |  |
| *Mustelus* | *asterias* | Mas | 01 |  | Wales | NEA |  |  |  |  |
| *Mustelus* | *asterias* | Mas | 02 |  | Wales | NEA |  |  |  |  |
| *Mustelus* | *asterias* | Mas | 03 |  | Wales | NEA |  |  |  |  |
| *Mustelus* | *asterias* | Mas | 04 |  | Wales | NEA |  |  |  |  |
| *Mustelus* | *asterias* | Mas | 05 |  | Wales | NEA |  |  |  |  |
| *Mustelus* | *asterias* | Mas | 06 |  | Wales | NEA |  |  |  |  |
| *Mustelus* | *asterias* | Mas | 07 |  | Wales | NEA |  |  |  |  |
| *Mustelus* | *asterias* | Mas | 08 |  | Wales | NEA |  |  |  |  |
| *Mustelus* | *lenticulatus* | Mle | 01 |  | New Zealand | SWP |  |  |  |  |
| *Mustelus* | *lenticulatus* | Mle | 02 |  | New Zealand | SWP |  |  |  |  |
| *Mustelus* | *lenticulatus* | Mle | 03 |  | New Zealand | SWP |  |  |  |  |
| *Mustelus* | *lenticulatus* | Mle | 04 |  | New Zealand | SWP |  |  |  |  |
| *Mustelus* | *lenticulatus* | Mle | 05 |  | New Zealand | SWP |  |  |  |  |
| *Mustelus* | *lenticulatus* | Mle | 06 |  | New Zealand | SWP |  |  |  |  |
| *Mustelus* | *lenticulatus* | Mle | 07 |  | New Zealand | SWP |  |  |  |  |
| *Mustelus* | *lenticulatus* | Mle | 08 |  | New Zealand | SWP |  |  |  |  |
| *Mustelus* | *mosis* | Mmo | 01 | Salalah | Oman | NWI |  |  |  |  |
| *Mustelus* | *mosis* | Mmo | 02 | Salalah | Oman | NWI |  |  |  |  |
| *Mustelus* | *mosis* | Mmo | 03 | Salalah | Oman | NWI |  |  |  |  |
| *Mustelus* | *mosis* | Mmo | 04 | Salalah | Oman | NWI |  |  |  |  |
| *Mustelus* | *mustelus* | Mmu | 01 | Adriatic Sea | Italy | NEA |  |  |  |  |
| *Mustelus* | *mustelus* | Mmu | 02 | Adriatic Sea | Italy | NEA |  |  |  |  |
| *Mustelus* | *mustelus* | Mmu | 03 | Tyrrhenian Sea | Italy | NEA |  |  |  |  |
| *Mustelus* | *mustelus* | Mmu | 04 | Tyrrhenian Sea | Italy | NEA |  |  |  |  |
| *Mustelus* | *mustelus* | Mmu | 05 | Balearic Sea | Spain | NEA |  |  |  |  |
| *Mustelus* | *mustelus* | Mmu | 06 | Balearic Sea | Spain | NEA |  |  |  |  |
| *Mustelus* | *mustelus* | Mmu | 07 | Balearic Sea | Spain | NEA |  |  |  |  |
| *Mustelus* | *mustelus* | Mmu | 08 | Balearic Sea | Spain | NEA |  |  |  |  |
| *Mustelus* | *mustelus* | Mmu | 09 |  | Guinea-Bissau | NEA |  |  |  |  |
| *Mustelus* | *mustelus* | Mmu | 10 |  | Guinea-Conakry | NEA |  |  |  |  |
| *Mustelus* | *mustelus* | Mmu | 11 |  | Cape Verde | NEA |  |  |  |  |
| *Mustelus* | *mustelus* | Mmu | 12 |  | Cape Verde | NEA |  |  |  |  |
| *Mustelus* | *mustelus* | Mmu | 13 | Dunes | Angola | SEA-SWI |  |  |  |  |
| *Mustelus* | *mustelus* | Mmu | 14 | Dunes | Angola | SEA-SWI |  |  |  |  |
| *Mustelus* | *mustelus* | Mmu | 15 | Dunes | Angola | SEA-SWI |  |  |  |  |
| *Mustelus* | *mustelus* | Mmu | 16 | Dunes | Angola | SEA-SWI |  |  |  |  |
| *Mustelus* | *mustelus* | Mmu | 17 | Dunes | Angola | SEA-SWI |  |  |  |  |
| *Mustelus* | *mustelus* | Mmu | 18 |  | Namibia | SEA-SWI |  |  |  |  |
| *Mustelus* | *mustelus* | Mmu | 19 | Langebaan Lagoon | South Africa | SEA-SWI |  |  |  |  |
| *Mustelus* | *mustelus* | Mmu | 20 | False Bay | South Africa | SEA-SWI |  |  |  |  |
| *Mustelus* | *mustelus* | Mmu | 21 | False Bay | South Africa | SEA-SWI |  |  |  |  |
| *Mustelus* | *mustelus* | Mmu | 22 | Mossel Bay | South Africa | SEA-SWI |  |  |  |  |
| *Mustelus* | *mustelus* | Mmu | 23 | Durban | South Africa | SEA-SWI |  |  |  |  |
| *Mustelus* | *palumbes* | Mpa | 01 | West Coast | South Africa | SEA-SWI |  |  |  |  |
| *Mustelus* | *palumbes* | Mpa | 02 | West Coast | South Africa | SEA-SWI |  |  |  |  |
| *Mustelus* | *palumbes* | Mpa | 03 | West Coast | South Africa | SEA-SWI |  |  |  |  |
| *Mustelus* | *palumbes* | Mpa | 04 | West Coast | South Africa | SEA-SWI |  |  |  |  |
| *Mustelus* | *palumbes* | Mpa | 05 | Mossel Bay | South Africa | SEA-SWI |  |  |  |  |
| *Mustelus* | *palumbes* | Mpa | 06 | Mossel Bay | South Africa | SEA-SWI |  |  |  |  |
| *Mustelus* | *palumbes* | Mpa | 07 | Struis Bay | South Africa | SEA-SWI |  |  |  |  |
| *Mustelus* | *palumbes* | Mpa | 08 | Struis Bay | South Africa | SEA-SWI |  |  |  |  |
| *Mustelus* | *punctulatus* | Mpu | 01 | Alboran Sea | Algeria | NEA |  |  |  |  |
| *Mustelus* | *punctulatus* | Mpu | 02 | Alboran Sea | Algeria | NEA |  |  |  |  |
| *Mustelus* | *punctulatus* | Mpu | 03 | Alboran Sea | Algeria | NEA |  |  |  |  |
| *Mustelus* | *punctulatus* | Mpu | 04 | Alboran Sea | Algeria | NEA |  |  |  |  |
| *Mustelus* | *punctulatus* | Mpu | 05 | Adriatic Sea | Croatia | NEA |  |  |  |  |
| *Mustelus* | *punctulatus* | Mpu | 06 | Adriatic Sea | Croatia | NEA |  |  |  |  |
| *Mustelus* | *punctulatus* | Mpu | 07 | Adriatic Sea | Croatia | NEA |  |  |  |  |
| *Mustelus* | *punctulatus* | Mpu | 08 | Adriatic Sea | Croatia | NEA |  |  |  |  |
| *Scylliogaleus* | *quecketti* | Squ | 01 | Durban | South Africa | SEA-SWI |  |  |  |  |
| *Scylliogaleus* | *quecketti* | Squ | 02 | Durban | South Africa | SEA-SWI |  |  |  |  |
| *Scylliogaleus* | *quecketti* | Squ | 03 | Durban | South Africa | SEA-SWI |  |  |  |  |
| *Scylliogaleus* | *quecketti* | Squ | 04 | Durban | South Africa | SEA-SWI |  |  |  |  |
| *Scylliogaleus* | *quecketti* | Squ | 05 | Durban | South Africa | SEA-SWI |  |  |  |  |
| *Scylliogaleus* | *quecketti* | Squ | 06 | Durban | South Africa | SEA-SWI |  |  |  |  |
| *Scylliogaleus* | *quecketti* | Squ | 07 | Durban | South Africa | SEA-SWI |  |  |  |  |
| *Scylliogaleus* | *quecketti* | Squ | 08 | Durban | South Africa | SEA-SWI |  |  |  |  |
| *Triakis* | *megalopterus* | Tme | 01 | Dunes | Angola | SEA-SWI |  |  |  |  |
| *Triakis* | *megalopterus* | Tme | 02 | Dunes | Angola | SEA-SWI |  |  |  |  |
| *Triakis* | *megalopterus* | Tme | 03 |  | Namibia | SEA-SWI |  |  |  |  |
| *Triakis* | *megalopterus* | Tme | 04 |  | Namibia | SEA-SWI |  |  |  |  |
| *Triakis* | *megalopterus* | Tme | 05 | West Coast | South Africa | SEA-SWI |  |  |  |  |
| *Triakis* | *megalopterus* | Tme | 06 | West Coast | South Africa | SEA-SWI |  |  |  |  |
| *Triakis* | *megalopterus* | Tme | 07 | East Coast | South Africa | SEA-SWI |  |  |  |  |
| *Triakis* | *megalopterus* | Tme | 08 | East Coast | South Africa | SEA-SWI |  |  |  |  |
| *Iago* | *omanensis* | Iom | 01 | Salalah | Oman | NWI |  |  |  |  |
| *Iago* | *omanensis* | Iom | 02 | Salalah | Oman | NWI |  |  |  |  |
| *Iago* | *omanensis* | Iom | 03 | Salalah | Oman | NWI |  |  |  |  |
| *Iago* | *omanensis* | Iom | 04 | Salalah | Oman | NWI |  |  |  |  |

**APPENDIX S3 – Primers**

**Supplementary Table S3** Primers used for DNA amplification and sequencing in this study.

| **DNA region** | **Primer name** | **Sequence** | **Forward/reverse** | **References** |
| --- | --- | --- | --- | --- |
| *Mitochondrial* |  |  |  |  |
| NADH-2 | ILEM | 5ʹ-AAGGAGCAGTTTGATAGAGT-3ʹ | F | Naylor *et al*. (2005) |
| Ilem-*Mustelus* | 5ʹ-AAGGACCACTTTGATAGAGT-3ʹ | F | Naylor *et al*. (2005) |
| Asn-*Mustelus* | 5ʹ-AACGCTTAGCTGTTAATTAA-3ʹ | R | Naylor *et al*. (2005) |
| CR | MaCybF | 5'-TAACTTGAATTGGRGGRCAAC-3' | F | Boomer *et al*. (2012) |
| MaDLPR | 5'-GCATTAATCAGATGYCAGRT-3' | R | Boomer *et al*. (2012) |
| 12S-16S rRNA | Chon-Mito-S005 | 5'-AGGCAAGTCGTAACATGGTAAG-3' | F | Iglésias *et al*. (2005) |
| Chon-Mito-R017 | 5'-ATCCAACATCGAGGTCGTAAACC-3' | R | Iglésias *et al*. (2005) |
| *Nuclear* |  |  |  |  |
| KBTBD2 | KBTBD2_F9 | 5'-TGTATTGCATCGTTGTCGRGAATA-3' | F (nested-PCR round 1) | Li *et al*. (2012) |
| KBTBD2_R1522 | 5'-GCAATGCAACCATCTCTCCATC-3' | R (nested-PCR round 1) | Li *et al*. (2012) |
|  | KBTBD2_F49 | 5'-AATGCAGAGAACTGYGTGCGAT-3' | F (nested-PCR round 2) | Li *et al*. (2012) |
| KBTBD2_R1515 | 5'-AACCATCTCTCCATCCAAYTCAAACTC-3' | R (nested-PCR round 2) | Li *et al*. (2012) |

**References**

Boomer JJ, Harcourt RG, Francis MP, Stow AJ. 2012. Genetic divergence, speciation and biogeography of *Mustelus* (sharks) in the central Indo-Pacific and Australasia. *Molecular Phylogenetics and Evolution* 64: 697–703.

Iglésias SP, Lecointre G, Sellos DY. 2005. Extensive paraphylies within sharks of the order Carcharhiniformes inferred from nuclear and mitochondrial genes. *Molecular Phylogenetics and Evolution* 34: 569–583.

Li C, Matthes-Rosana KA, Garcia M, Naylor GJ. 2012. Phylogenetics of Chondrichthyes and the problem of rooting phylogenies with distant outgroups. *Molecular Phylogenetics and Evolution* 63: 365–373.

Naylor GJ, Ryburn JA, Fedrigo O, Lopez JA. 2005. Phylogenetic relationships among the major lineages of modern elasmobranchs. *Reproductive Biology and Phylogeny* 3: 25.

**APPENDIX S4 – phylogenetic reconstruction**

**Supplementary Figure S1** Strict consensus of the most parsimonious trees obtained for the nuclear KBTBD2 gene. Bootstrap support is shown above branches. See Tables S2 for species code.


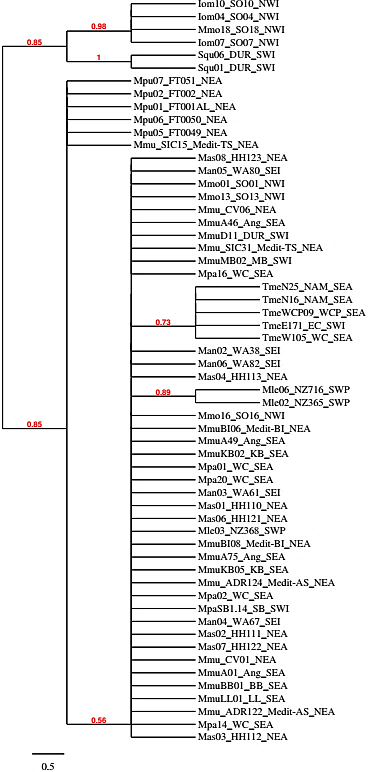


**Supplementary Figure S2** Maximum likelihood phylogram obtained for the nuclear KBTBD2 gene. Bootstrap support is shown above branches. See Tables S2 for species code.


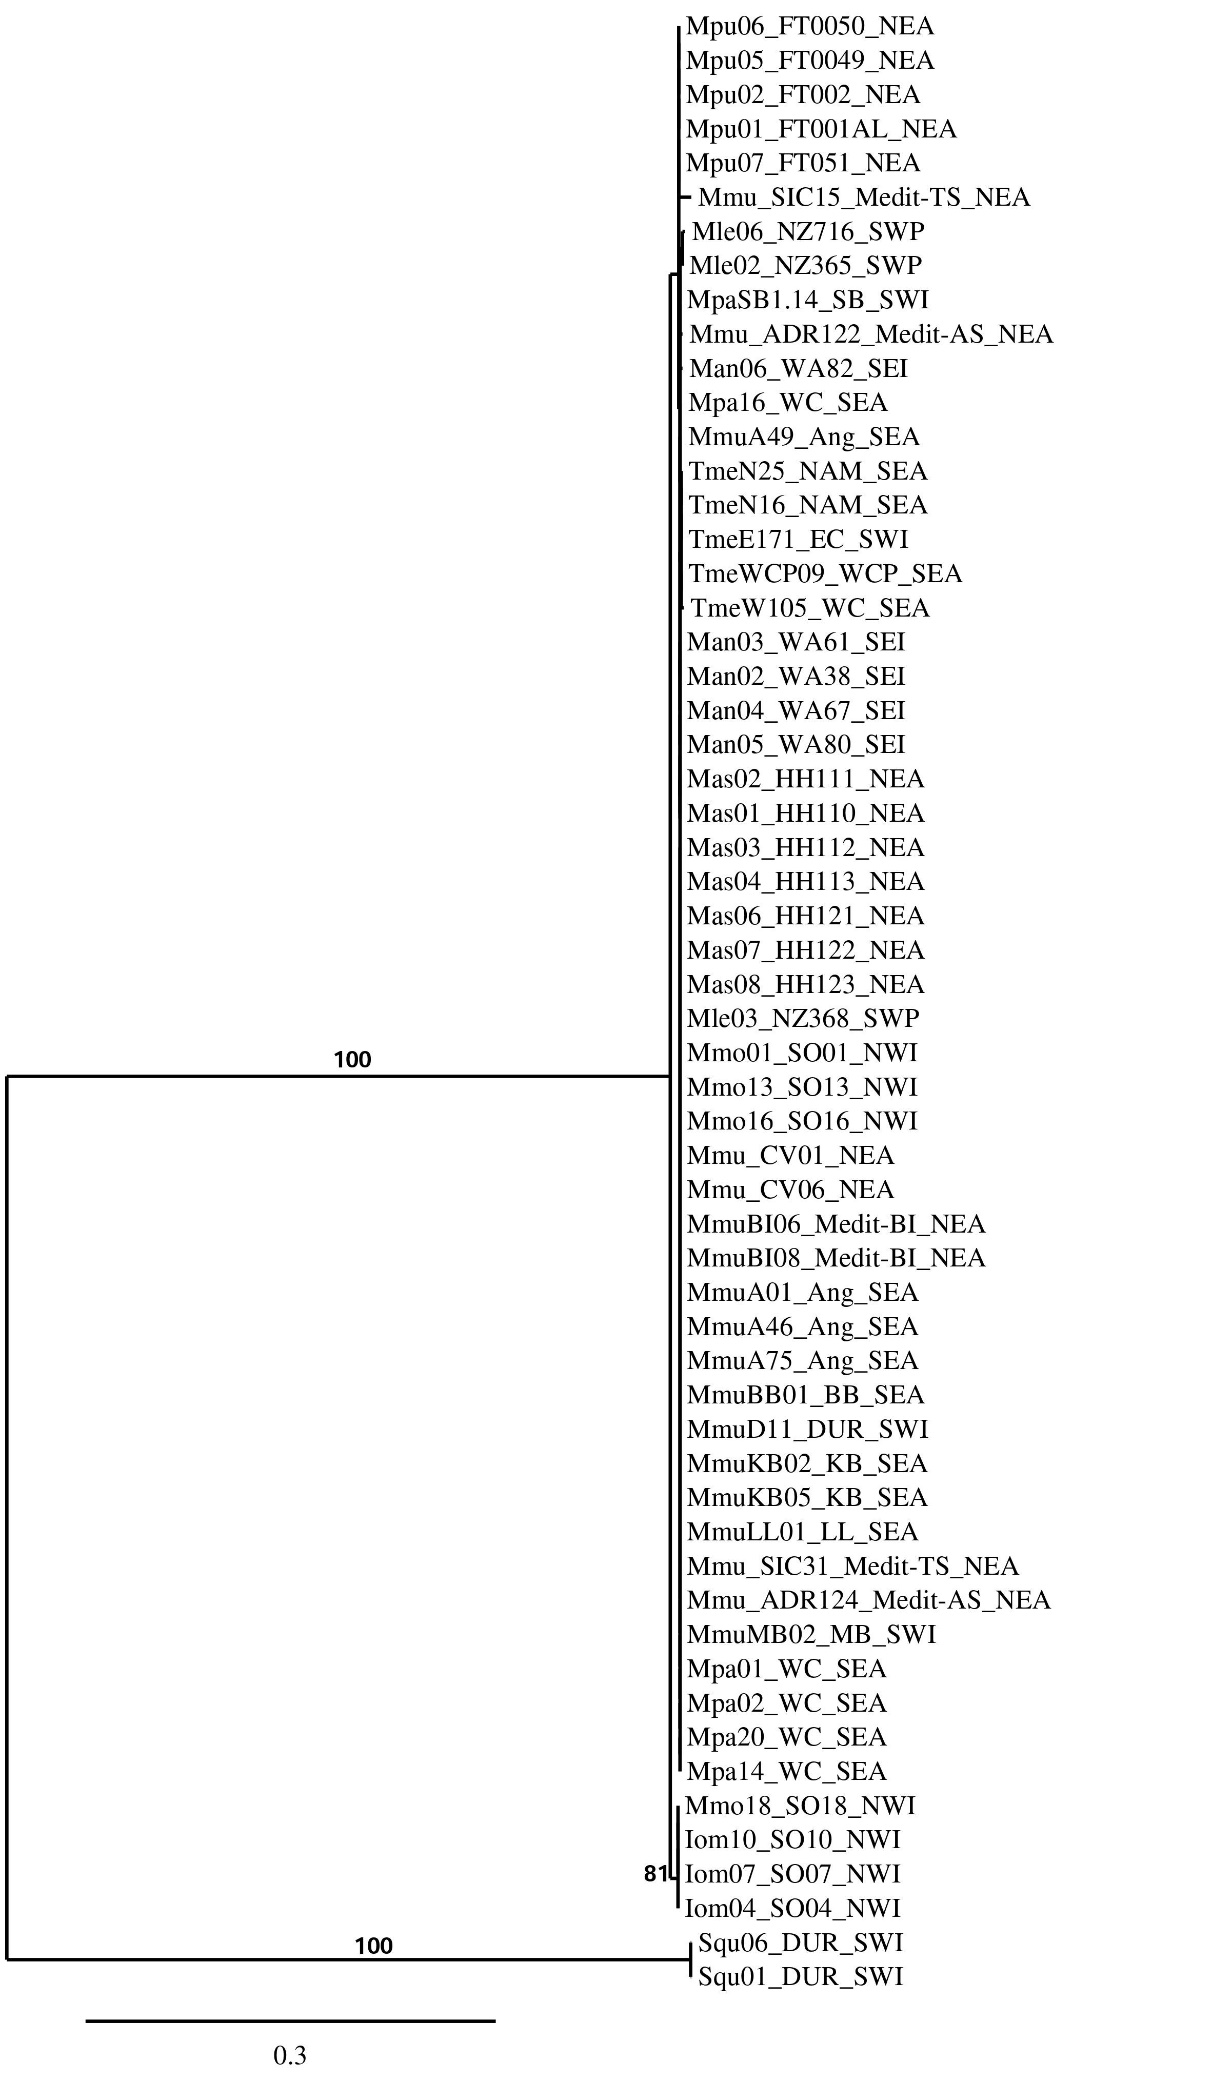


**Supplementary Figure S3** Strict consensus of the most parsimonious trees obtained for the CR. Bootstrap support is shown above branches. See Tables S2 for species code.


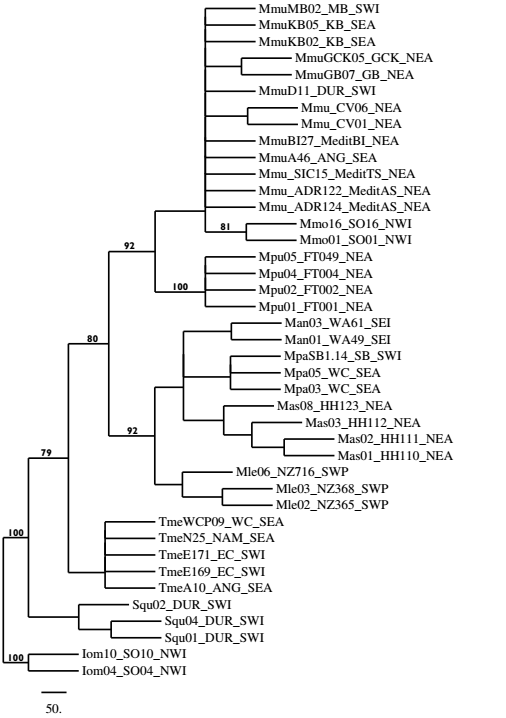


**Supplementary Figure S4** Maximum likelihood phylogram obtained for the CR. Bootstrap support is shown above branches. See Tables S2 for species code.


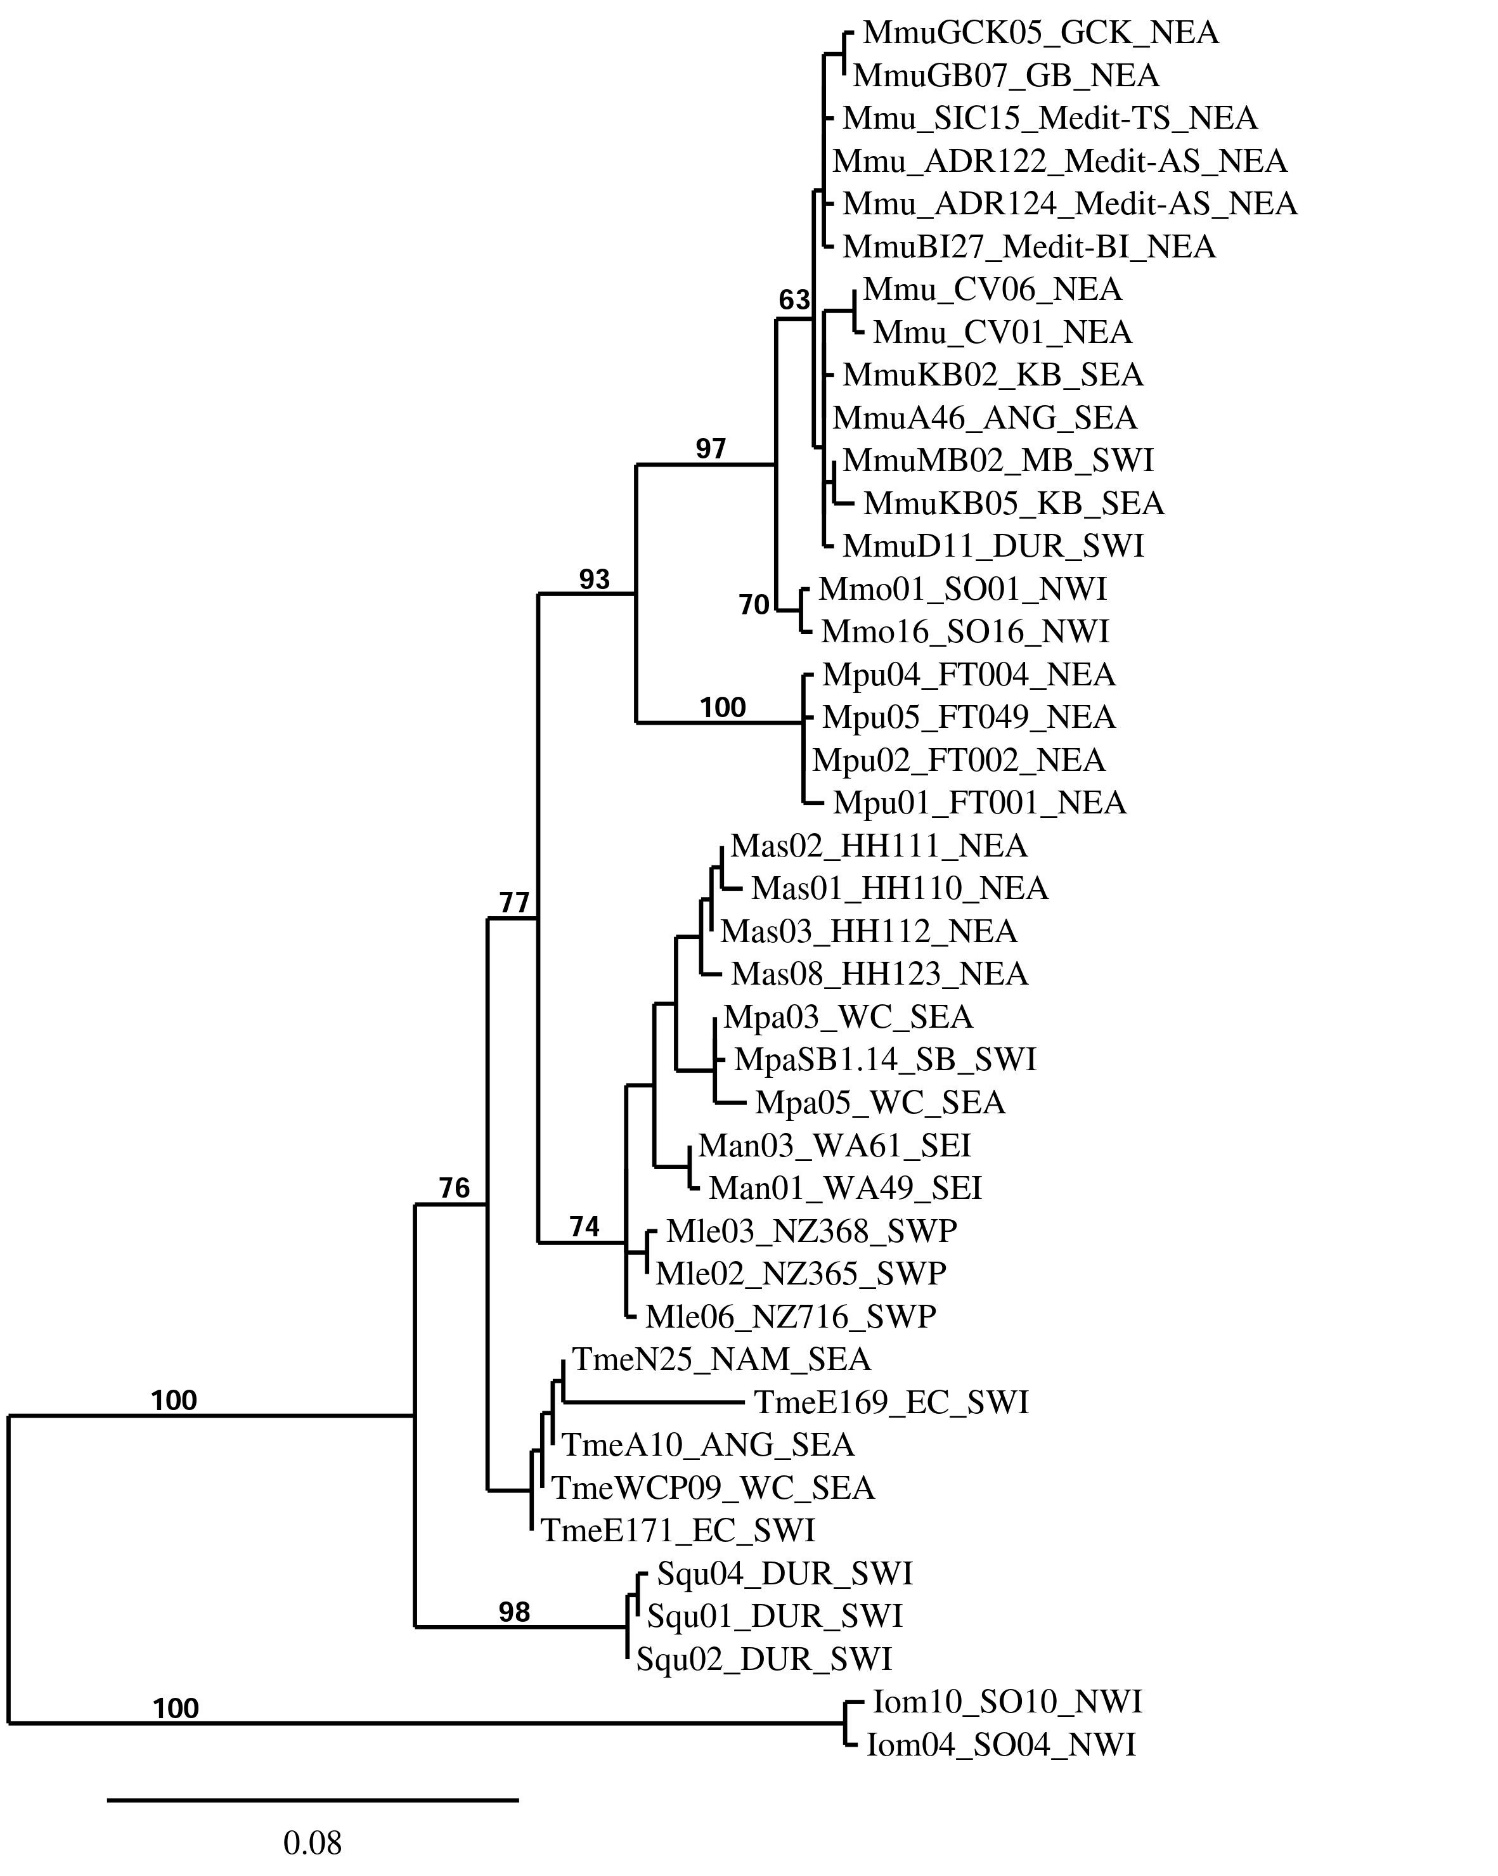


**Supplementary Figure S5** Strict consensus of the most parsimonious trees obtained for the NADH-2. Bootstrap support is shown above branches. See Tables S2 for species code.


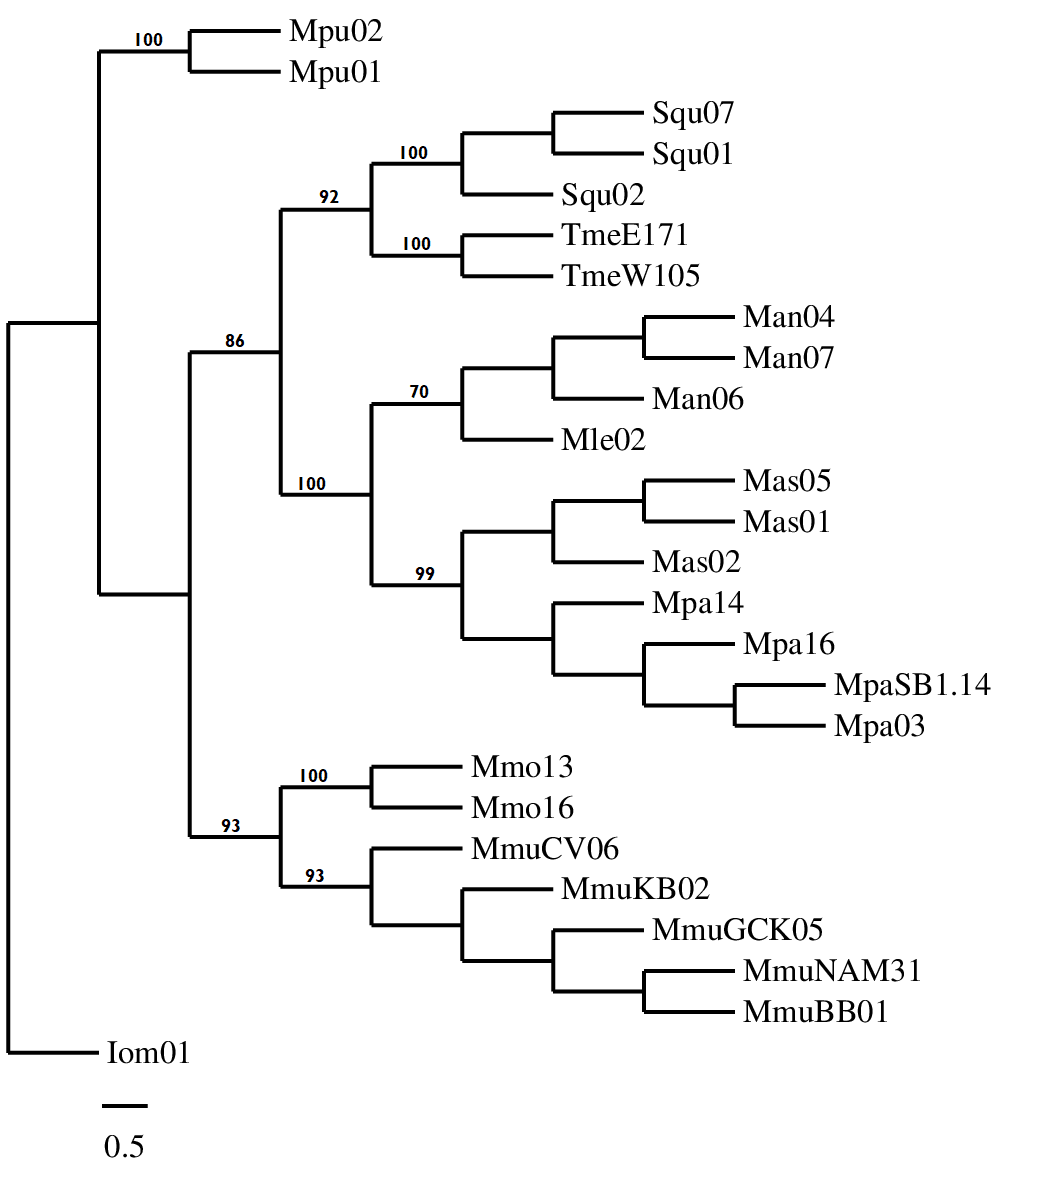


**Supplementary Figure S6** Maximum likelihood phylogram obtained for the NADH-2. Bootstrap support is shown above branches. See Tables S2 for species code.


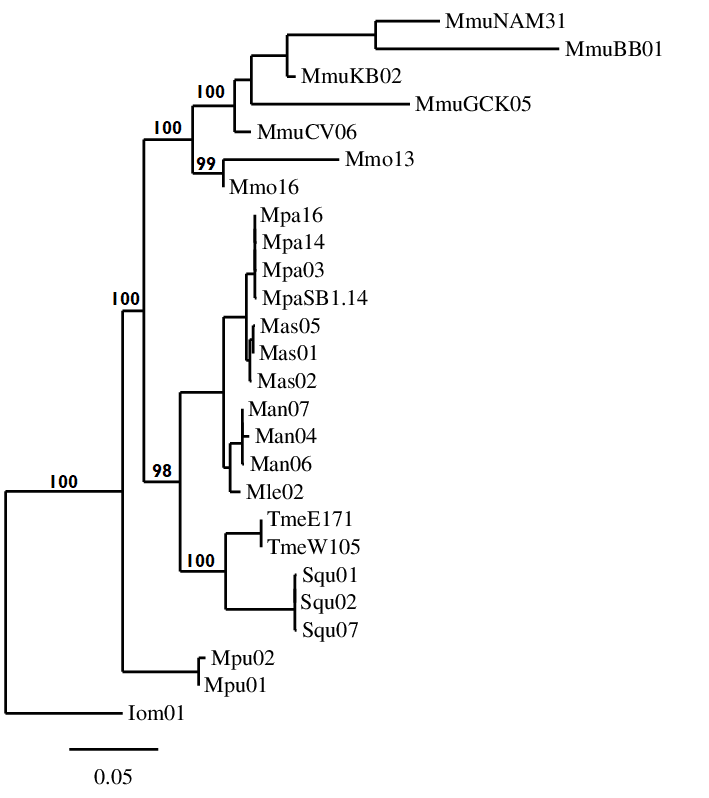


**Supplementary Figure S7** Strict consensus of the most parsimonious trees obtained for the NADH-2 including a comprehensive set of *Mustelus* species. Bootstrap support is shown within nodes. The ‘placental’ is represented in green and the ‘aplacental’ clade in blue.

**
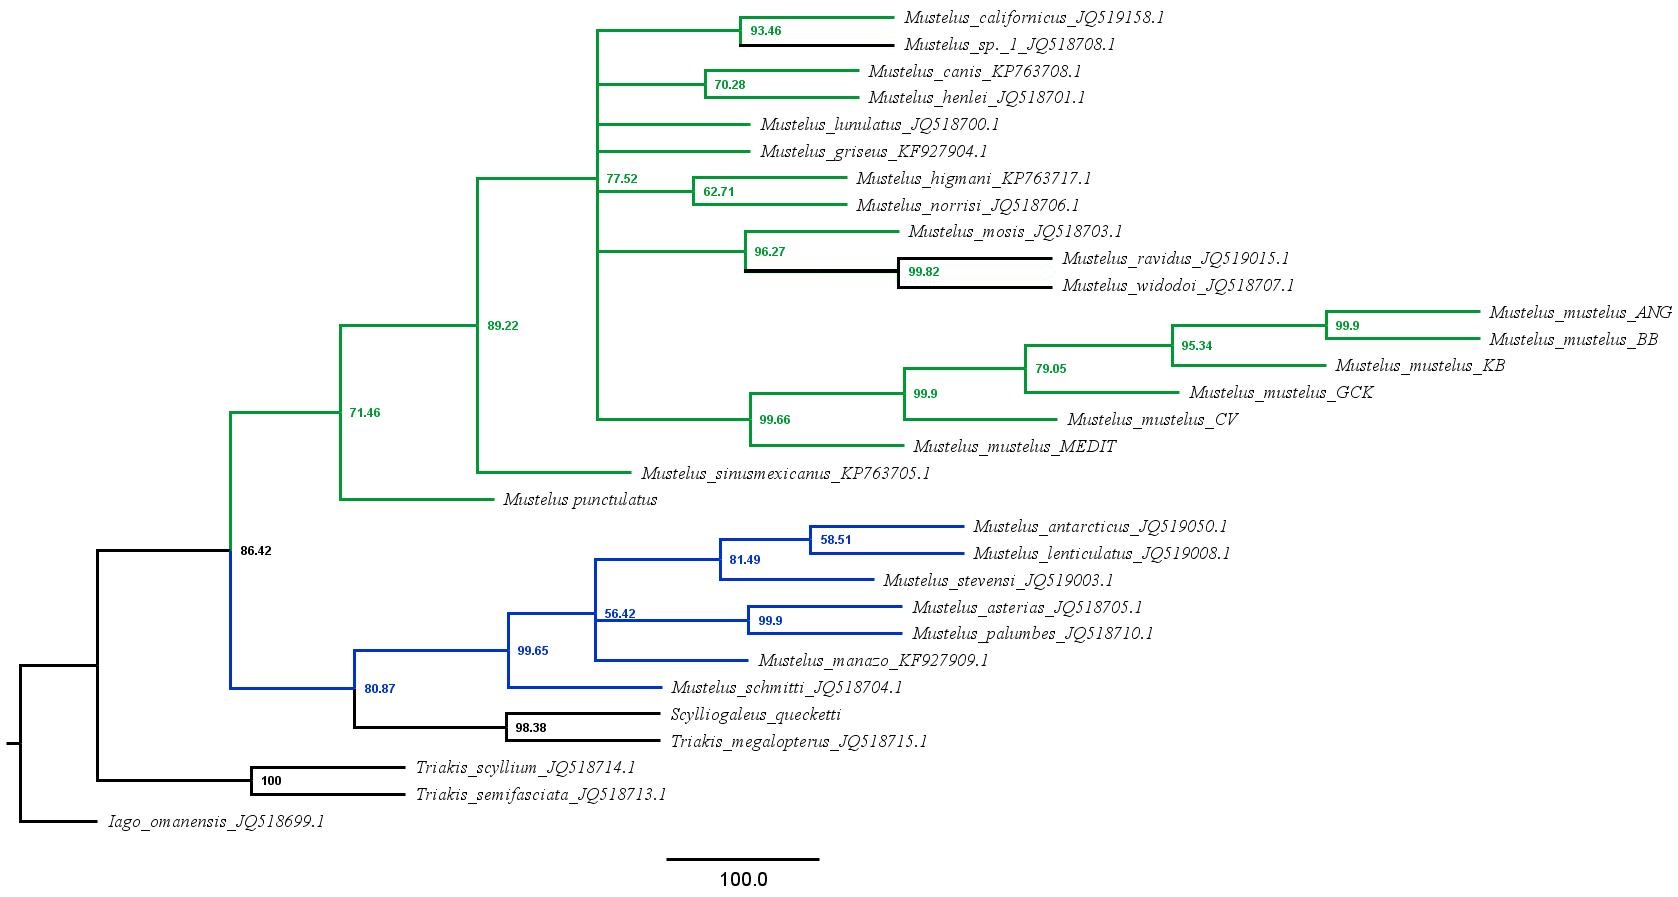
**

**Supplementary Figure S8** Maximum likelihood phylogram obtained for the NADH-2 including a comprehensive set of *Mustelus* species. Bootstrap support is shown within nodes. The ‘placental’ is represented in green and the ‘aplacental’ clade in blue.


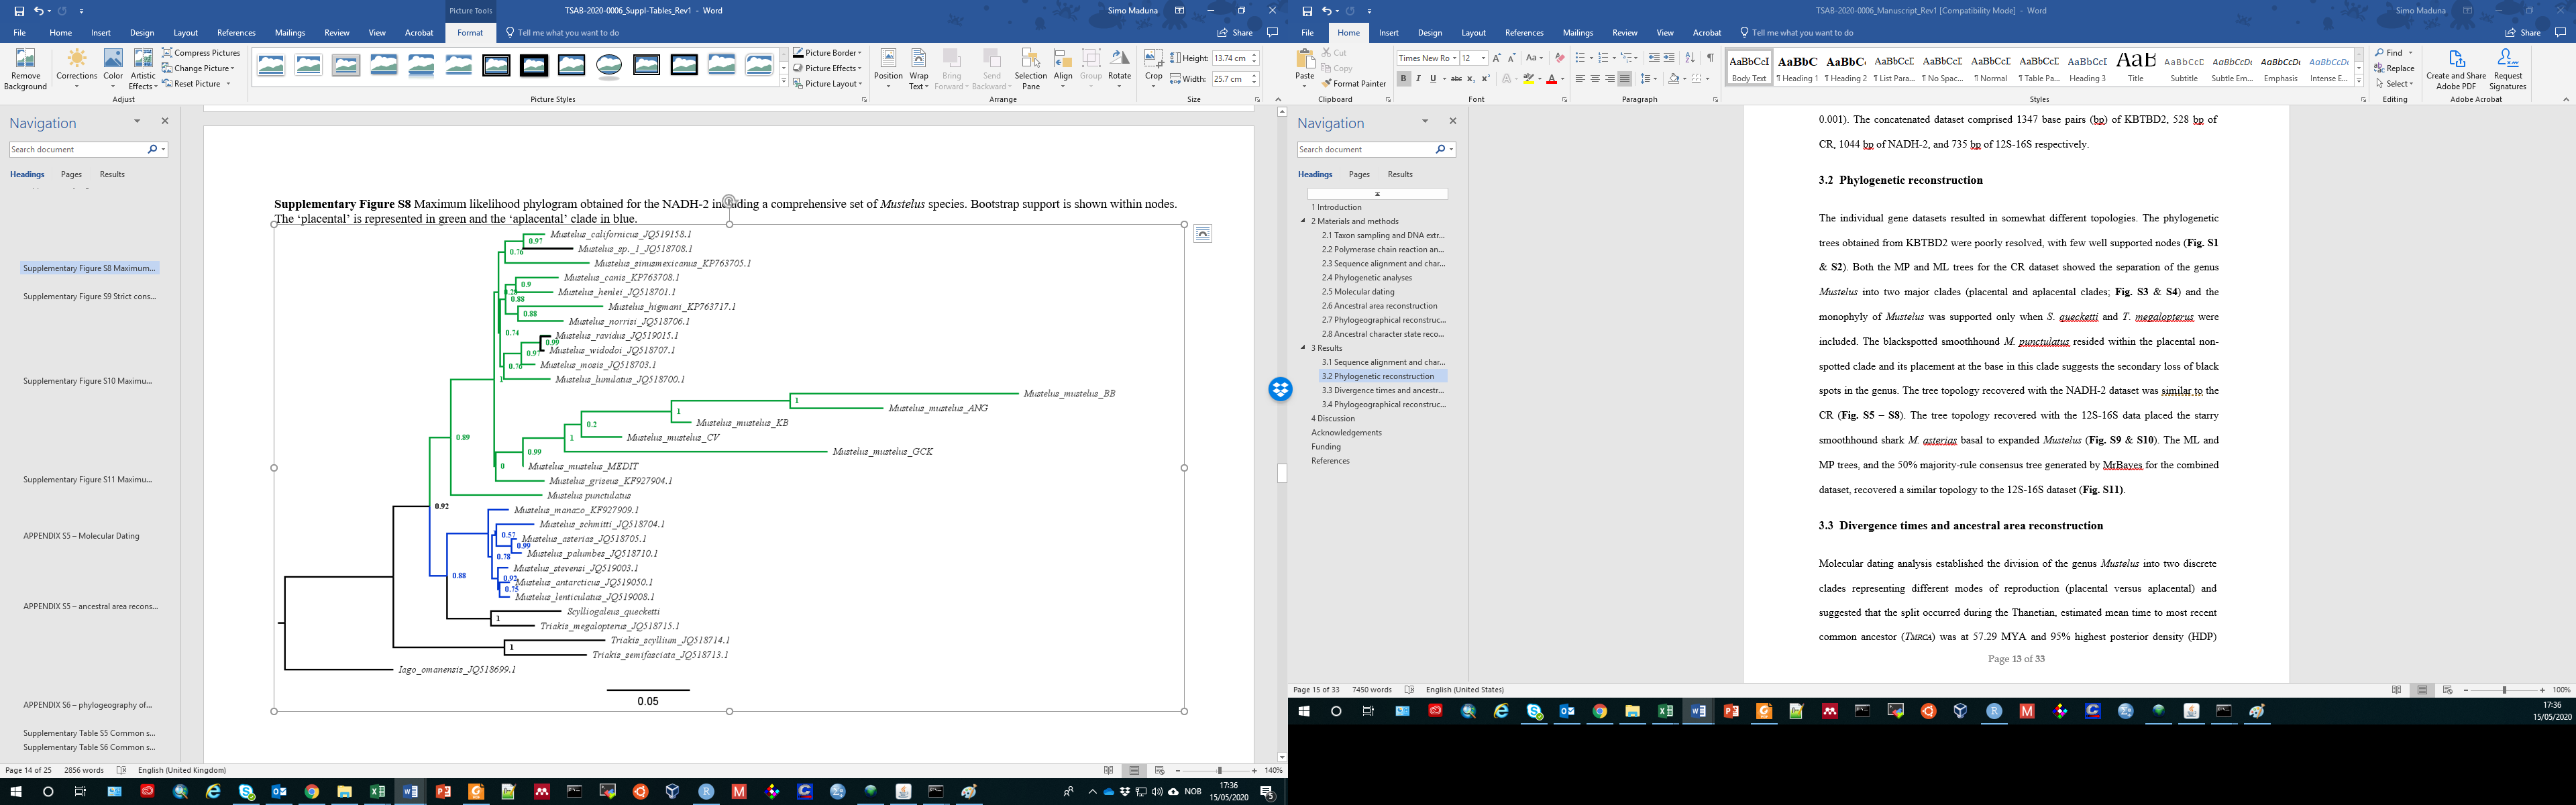


**Supplementary Figure S9** Strict consensus of the most parsimonious trees obtained for the 12S-16S rRNA region. Bootstrap support is shown above branches. See Tables S2 for species code.


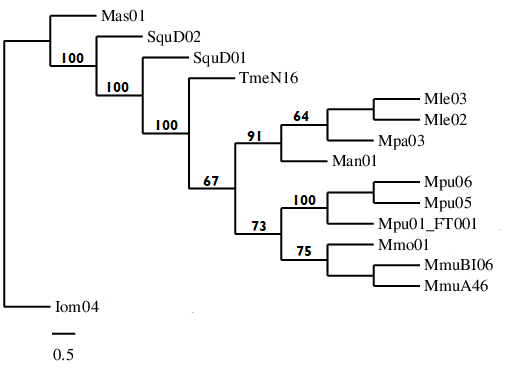


**Supplementary Figure S10** Maximum likelihood phylogram obtained for the 12S-16S rRNA region. Bootstrap support is shown above branches. See Tables S2 for species code.


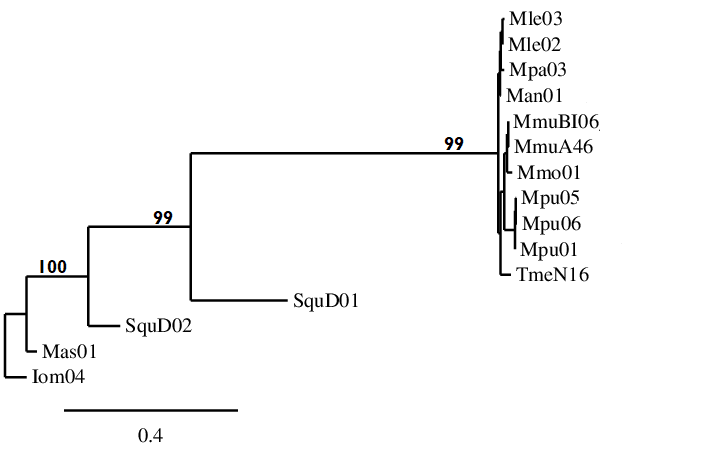


**Supplementary Figure S11** Maximum likelihood phylogeny of a regional subset of Mustelus based on 3474 bp spanning four gene fragments (KBTBD2, CR, NADH-2 and 12S-16S). The bootstrap/posterior probability values are given for
major clades above branches for ML/BI analyses, respectively. See Table S1 for location and biogeographic
region code.


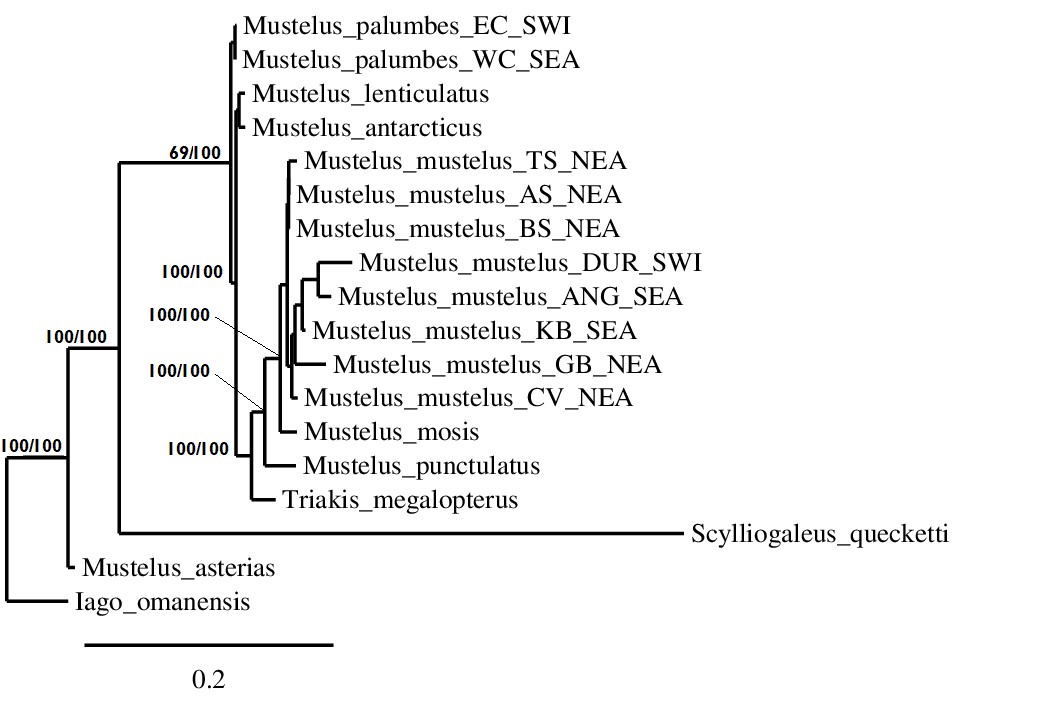


**APPENDIX S5 – Molecular Dating**

**Supplementary Figure S12** Bayesian timetree obtained from the BEAST analysis. Values at nodes represent posterior probabilities from the BEAST analysis. Navy blue bars indicate 95% HDP interval of inferred node ages.

**
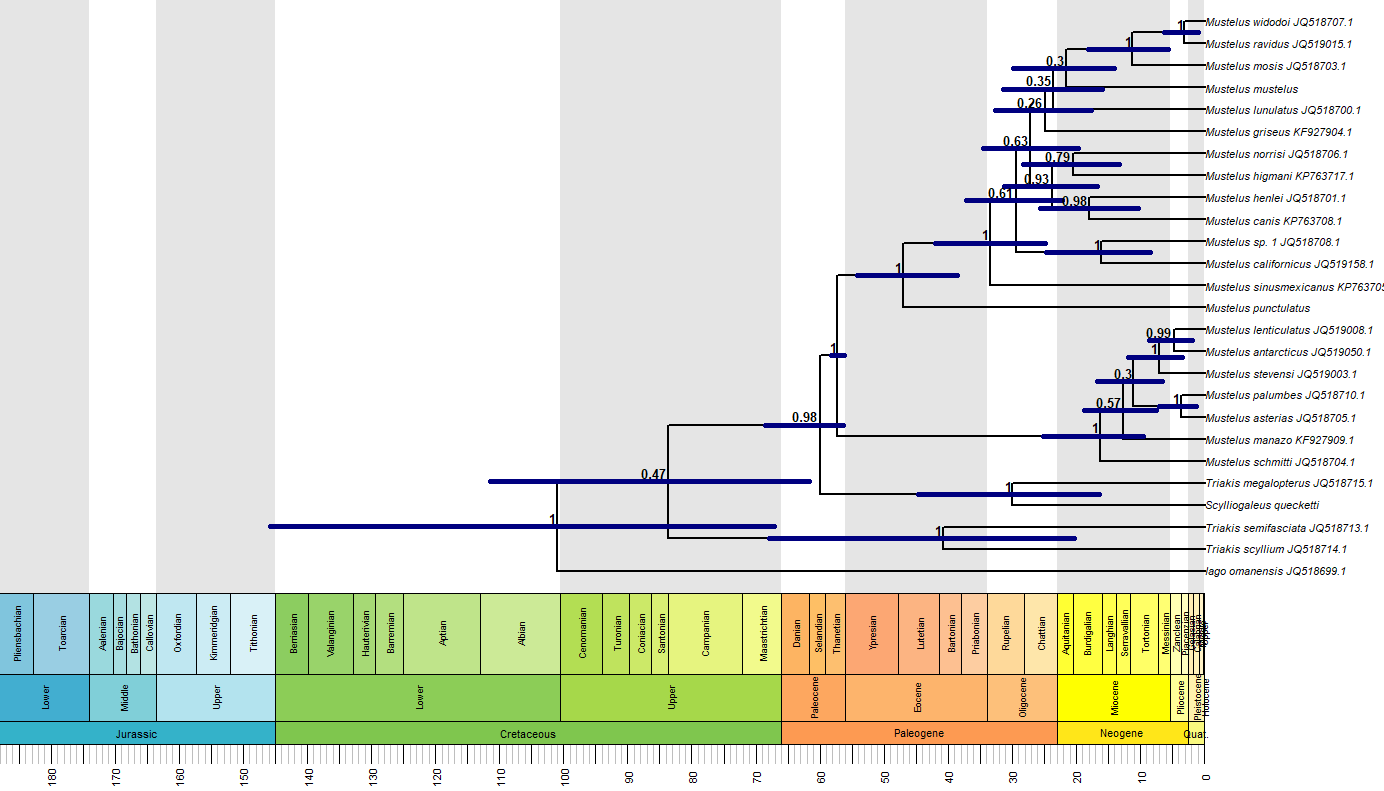
**

**APPENDIX S5 – ancestral area reconstruction**

**Supplementary Table S4** Comparison of the six models implemented in the BioGeoBEARS analyses on the dataset including all study taxa for the CR and NADH-2, and including only Mustelus taxa, showing results of likelihood ratio tests (Chi2) testing models with additional “J” parameter (alternative model, [alt]) against models without “J” (null model [null]). Best fitting model indicated in **boldface**.

| Dataset | alt | null | LnLalt | LnLnull | DF alt | DF null | DF | D-Stat. | *p*-value | AIC1 | AIC2 | AICweight_model1 | AICweight_model2 |
| --- | --- | --- | --- | --- | --- | --- | --- | --- | --- | --- | --- | --- | --- |
|  | **DEC+J** | DEC | -103 | -114.7 | 3 | 2 | 1 | 23.45 | 1.30E-06 | 212 | 233.5 | 1 | 2.20E-05 |
| NADH-2 | DIVALIKE+J | DIVALIKE | -104.4 | -115.3 | 3 | 2 | 1 | 21.66 | 3.30E-06 | 214.9 | 234.5 | 1 | 5.40E-05 |
|  | BAYAREALIKE+J | BAYAREALIKE | -103.8 | -118.2 | 3 | 2 | 1 | 28.8 | 8.00E-08 | 213.6 | 240.4 | 1 | 1.50E-06 |

**Supplementary Figure S13** BioGeoBEARS phylogram corresponding to the DEC+J model (Table 2). Pie charts represent the probabilities of each possible geographic area before and after each split.


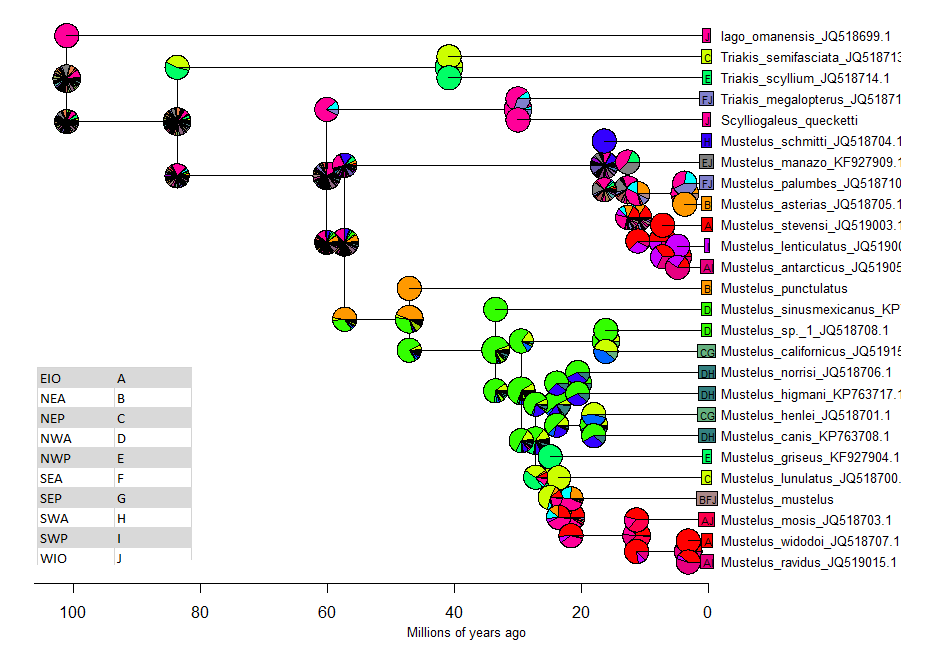


**APPENDIX S6 – phylogeography of *mustelus mustelus***

**Supplementary Table S5** Common smoothhound shark mitochondrial control region (CR) polymorphic nucleotide positions for 15 haplotypes. A dot indicates that the base in that position is the same as the base in Haplotype 1

| Haplotype number | Nucleotide Position | | | | | | | | | | | | | | | | | | GenBank Accession number |
| --- | --- | --- | --- | --- | --- | --- | --- | --- | --- | --- | --- | --- | --- | --- | --- | --- | --- | --- | --- |
| 0  0  2 | 0  1  3 | 0  2  0 | 0  2  6 | 0  5  0 | 0  6  7 | 1  2  6 | 3  9  0 | 4  7  3 | 5  1  3 | 5  1  4 | 5  2  0 | 5  3  5 | 5  5  9 | 5  8  1 | 5  9  5 | 6  2  6 | 6  4  0 |
| MmuCR_01 | C | T | T | T | A | T | T | A | C | G | A | T | T | A | T | T | T | T |  |
| MmuCR_02 | . | . | . | . | . | . | . | G | . | . | . | . | . | . | . | . | . | . |  |
| MmuCR_03 | . | . | . | . | . | C | . | G | . | . | . | . | . | . | . | . | . | . |  |
| MmuCR_04 | A | . | . | . | . | . | . | G | . | . | . | . | . | . | . | . | . | . |  |
| MmuCR_05 | . | . | . | . | . | . | . | G | . | . | . | C | . | T | . | . | . | . |  |
| MmuCR_06 | . | . | . | . | . | . | . | G | . | . | G | C | . | T | . | . | . | . |  |
| MmuCR_07 | . | . | . | . | G | . | . | G | T | A | . | C | . | . | C | C | . | . |  |
| MmuCR_08 | . | . | . | . | . | . | . | G | T | A | . | C | . | . | C | C | . | . |  |
| MmuCR_09 | . | . | . | . | . | . | . | G | . | . | . | . | . | . | C | C | C | . |  |
| MmuCR_10 | . | . | . | C | . | . | . | G | . | . | . | . | . | . | C | C | C | . |  |
| MmuCR_11 | . | . | . | . | . | . | . | G | . | . | . | . | . | . | C | C | C | A |  |
| MmuCR_12 | . | . | . | . | . | . | . | G | . | . | . | . | C | . | C | C | C | . |  |
| MmuCR_13 | A | G | G | . | . | . | . | G | . | . | . | . | . | . | C | C | C | . |  |
| MmuCR_14 | A | . | . | . | . | . | . | G | . | . | . | . | . | . | C | C | C | . |  |
| MmuCR_15 | . | . | . | . | . | . | C | G | . | . | . | . | . | . | C | C | C | . |  |

**Supplementary Table S6** Common smoothhound shark nuclear kelch repeat and BTB domain containing 2 (KBTBD2) gene polymorphic nucleotide positions for 14 haplotypes. A dot indicates that the base in that position is the same as the base in Haplotype 1

| Haplotype number | Nucleotide Position | | | | | | | | | | | | | | | | | | | | | | | | | | | | | | GenBank Accession number |
| --- | --- | --- | --- | --- | --- | --- | --- | --- | --- | --- | --- | --- | --- | --- | --- | --- | --- | --- | --- | --- | --- | --- | --- | --- | --- | --- | --- | --- | --- | --- | --- |
| 0  0  4  2 | 0  3  0  3 | 0  4  1  8 | 0  4  2  6 | 0  4  7  9 | 0  5  2  4 | 0  5  4  8 | 0  5  8  0 | 0  5  9  6 | 0  7  3  0 | 0  7  3  5 | 0  7  6  4 | 1  0  5  6 | 1  0  5  9 | 1  0  9  3 | 1  1  0  9 | 1  1  1  2 | 1  1  1  5 | 1  1  2  4 | 1  1  3  9 | 1  1  4  0 | 1  1  5  0 | 1  1  5  1 | 1  1  8  4 | 1  1  9  9 | 1  2  0  0 | 1  2  8  8 | 1  3  0  8 | 1  3  2  7 | 1  3  3  9 |
| MmuKBTBD2_01 | T | T | A | G | A | A | A | G | A | G | G | G | A | C | A | C | A | A | C | C | G | T | G | A | A | T | T | A | G | A |  |
| MmuKBTBD2_02 | . | . | . | . | . | . | . | . | . | . | . | . | . | T | C | G | . | T | G | T | . | G | . | . | . | . | . | C | C | . |  |
| MmuKBTBD2_03 | . | . | G | . | G | . | C | . | . | . | . | . | . | T | . | G | . | T | G | T | . | . | . | . | . | . | . | C | . | T |  |
| MmuKBTBD2_04 | . | . | . | . | G | . | C | . | . | . | . | . | . | T | . | G | . | . | G | T | . | . | . | . | . | . | . | . | . | T |  |
| MmuKBTBD2_05 | . | C | . | . | G | . | C | A | . | T | C | C | C | . | C | . | C | . | . | . | A | G | A | C | C | A | A | C | C | G |  |
| MmuKBTBD2_06 | . | . | . | . | G | . | C | A | . | T | C | C | C | . | C | . | C | . | . | . | A | G | A | C | C | A | A | C | C | G |  |
| MmuKBTBD2_07 | . | C | . | . | G | . | C | . | . | . | . | . | . | T | . | G | . | C | G | T | . | . | . | . | . | . | . | . | . | T |  |
| MmuKBTBD2_08 | . | . | . | . | G | . | C | . | . | . | . | . | . | T | . | G | . | C | G | T | . | . | . | . | . | . | . | . | . | T |  |
| MmuKBTBD2_09 | C | . | . | . | G | . | C | . | . | . | . | . | . | T | . | G | . | C | G | T | . | . | . | . | . | . | . | . | . | T |  |
| MmuKBTBD2_10 | . | . | G | . | G | G | C | . | . | . | . | . | . | T | . | G | . | C | G | T | . | . | . | . | . | . | . | C | . | T |  |
| MmuKBTBD2_11 | C | C | . | . | G | . | C | . | . | . | . | . | . | T | . | G | . | C | G | T | . | . | . | . | . | . | . | . | . | T |  |
| MmuKBTBD2_12 | . | . | . | T | G | . | C | . | . | . | . | . | . | T | . | G | . | C | G | T | . | . | . | . | . | . | . | . | . | T |  |
| MmuKBTBD2_13 | . | . | . | . | G | . | C | . | G | . | . | . | . | T | . | G | . | C | G | T | . | . | . | . | . | . | . | . | . | T |  |
| MmuKBTBD2_14 | . | . | . | . | G | G | C | . | . | . | . | . | . | T | . | G | . | C | G | T | . | . | . | . | . | . | . | . | . | T |  |

**Supplementary Figure S14** Strict consensus maximum-parsimony tree with sites weighted equally for the control region haplotypes and *Mustelus punctulatus* as an outgroup. Values on trees are bootstrap support for nodes > 60%.


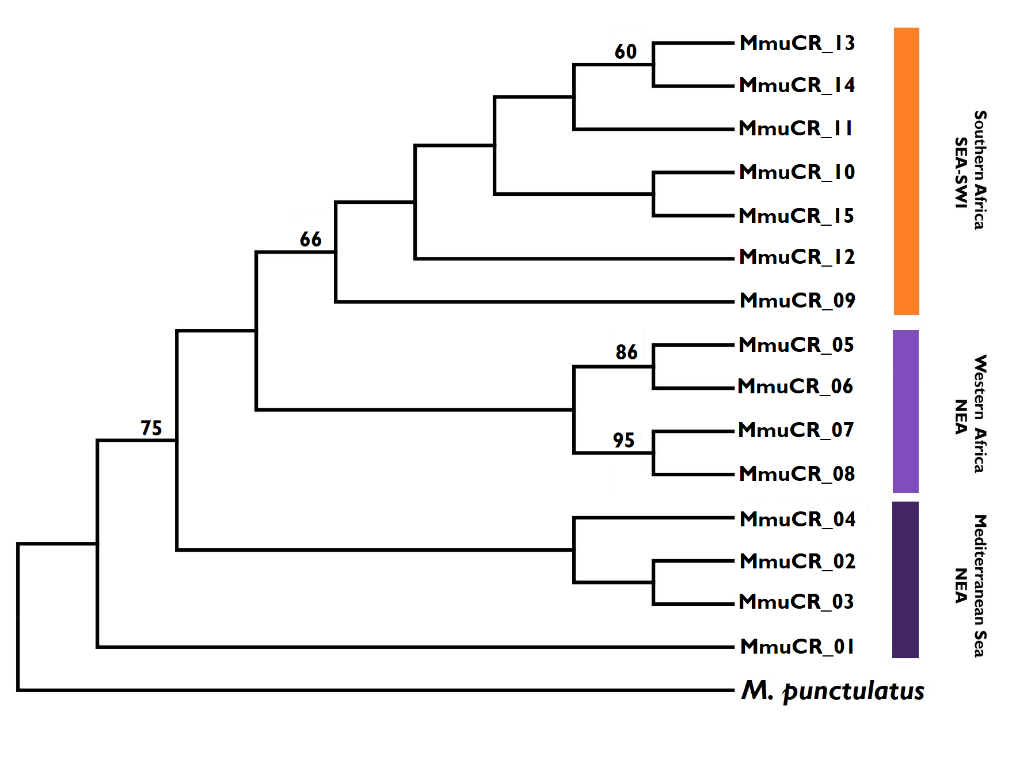


**Supplementary Figure S15** Maximum likelihood phylogram of the common smoothhound shark mitochondrial control region (*CR*) haplotypes. Bootstrap support is shown above branches.

**Supplementary Figure S16** Bayesian phylogram of the common smoothhound shark mitochondrial control region (CR) haplotypes. Clade credibility support is shown above branches.

**Supplementary Figure S17** Maximum likelihood phylogram of the common smoothhound shark nuclear kelch repeat and BTB domain containing 2 (KBTBD2) gene alleles/haplotypes. Bootstrap support is shown on branches.

**Supplementary Figure S18** Bayesian phylogram of the common smoothhound shark nuclear kelch repeat and BTB domain containing 2 (KBTBD2) gene alleles/haplotypes. Clade credibility support is shown above branches.
